# Supplementary material
Source: Springer Nature journal article supplement (https://www.springermedizin.de/resource/supplementary/12885_2013_5277_MOESM5_ESM.pdf/9465636)
Supplement: MOESM5 [file 9465636]

Additional Table 5. Characteristics of the 458 primary breast tumors correlated with *PIK3R1* expression status.

|                                              | Total population (%) | Number of patients (%)        |                                   | <i>P</i> -value <sup>a</sup> |
|----------------------------------------------|----------------------|-------------------------------|-----------------------------------|------------------------------|
|                                              |                      | <i>PIK3R1</i> underexpression | <i>PIK3R1</i> non-underexpression |                              |
| <i>Total</i>                                 | 458 (100.0)          | 283 (61.8)                    | 175 (38.2)                        |                              |
| <i>Age</i>                                   |                      |                               |                                   |                              |
| ≤50                                          | 99 (21.6)            | 61 (61.6)                     | 38 (38.4)                         | NS                           |
| >50                                          | 359 (78.4)           | 222 (61.8)                    | 137 (38.2)                        |                              |
| <i>SBR histological grade</i> <sup>b,c</sup> |                      |                               |                                   |                              |
| I                                            | 58 (12.6)            | 23 (39.7)                     | 35 (60.3)                         | <0.0000001                   |
| II                                           | 230 (50.2)           | 125 (54.3)                    | 105 (45.7)                        |                              |
| III                                          | 161 (35.2)           | 127 (78.9)                    | 34 (21.1)                         |                              |
| <i>Lymph node status</i> <sup>d</sup>        |                      |                               |                                   |                              |
| 0                                            | 120 (26.2)           | 82 (68.3)                     | 38 (31.7)                         | 0.013                        |
| 1-3                                          | 237 (51.7)           | 131 (55.3)                    | 106 (44.7)                        |                              |
| >3                                           | 100 (21.8)           | 69 (69.0)                     | 31 (31.0)                         |                              |
| <i>Macroscopic tumor size</i> <sup>e</sup>   |                      |                               |                                   |                              |
| ≤25mm                                        | 223 (48.7)           | 139 (62.3)                    | 84 (37.7)                         | NS                           |
| >25mm                                        | 227 (49.6)           | 140 (61.7)                    | 87 (38.3)                         |                              |
| <i>ERα status</i>                            |                      |                               |                                   |                              |
| Negative                                     | 119 (26.0)           | 103 (86.6)                    | 16 (13.4)                         | <0.0000001                   |
| Positive                                     | 339 (74.0)           | 180 (53.1)                    | 159 (46.9)                        |                              |
| <i>PR status</i>                             |                      |                               |                                   |                              |
| Negative                                     | 195 (42.6)           | 156 (80.0)                    | 39 (20.0)                         | <0.0000001                   |
| Positive                                     | 263 (57.4)           | 127 (48.3)                    | 136 (51.7)                        |                              |
| <i>ERBB2 status</i>                          |                      |                               |                                   |                              |
| Negative                                     | 359 (78.4)           | 211 (58.8)                    | 148 (41.2)                        | 0.011                        |
| Positive                                     | 99 (21.6)            | 72 (72.7)                     | 27 (27.3)                         |                              |
| <i>Molecular subtypes</i>                    |                      |                               |                                   |                              |
| HR- ERBB2-                                   | 69 (15.1)            | 61 (88.4)                     | 8 (11.6)                          | <0.0000001                   |
| HR- ERBB2+                                   | 45 (9.8)             | 40 (88.9)                     | 5 (11.1)                          |                              |
| HR+ ERBB2-                                   | 290 (63.3)           | 150 (51.7)                    | 140 (48.3)                        |                              |
| HR+ ERBB2+                                   | 54 (11.8)            | 32 (59.3)                     | 22 (40.7)                         |                              |
| <i>Patients treatments</i> <sup>f</sup>      |                      |                               |                                   |                              |
| No adjuvant treatment                        | 85 (19.3)            | 58 (68.2)                     | 27 (31.8)                         | 0.026                        |
| Chemotherapy                                 | 89 (20.2)            | 64 (71.9)                     | 25 (28.1)                         |                              |
| Hormonotherapy                               | 173 (39.3)           | 102 (59.0)                    | 71 (41.0)                         |                              |
| Chemo and Hormonotherapy                     | 93 (21.1)            | 49 (52.7)                     | 44 (47.3)                         |                              |
|                                              |                      | 10                            | 8                                 |                              |

<sup>a</sup>Chi<sup>2</sup> test. NS: not significant.

<sup>b</sup>Scarff-Bloom-Richardson classification.

<sup>c</sup>Information available for 449 patients.

<sup>d</sup>Information available for 457 patients.

<sup>e</sup>Information available for 450 patients.

<sup>f</sup>Information available for 440 patients.
